# Supplementary material for: New Human Papilloma Virus E2 Transcription Factor Mimics: A Tripyrrole-Peptide Conjugate with Tight and Specific DNA-Recognition
Source: PLoS One. 2011 Jul 25;6(7):e22409. doi: 10.1371/journal.pone.0022409 (PMC3143144; doi:10.1371/journal.pone.0022409)
Supplement: Text S3 — TFE titrations. (DOC) [file pone.0022409.s008.doc]

**SUPPLEMENTARY TEXT**

**Text S3. TFE titrations**

A TFE titration of the peptides was performed in order to test wether **E2-*Ala*** and **E2-*conj*** have a different helical population in water solution respect to the isolated **E2** peptide.

TFE titration experiments were done as previously described [10]. Briefly, 20 M peptide solution in 10 mM phosphate pH 7.0, with increasing TFE concentrations were incubated overnight at room temperature before measuring ellipticity at 222 nm. CD measurements were carried out on a Jasco J-810 spectropolarimeter using a Peltier temperature-controlled sample holder at 25 ºC.

It is possible to consider that the free energy for -helix depends linearly on the TFE/water molar ratio with a proportionality constant *m*:

In that case, the molar ellipticity at 222 nm during the titration can be fitted to the following equation to extract values for *G water* and *m*:

where []water and []TFE are the mean residue ellipticities in water and at high cosolvent concentration, R is the gas constant and T is the absolute temperature.

Molar ellipticity at 222 nm for **E2**, **E2-*ala*** and **E2-*conj*** was well fitted with the same *Gwater* (1.1 0.2 kcal/mol), so we can conclude that the three peptides have a similar helical population (see **Figure S3)**.
